# Supplementary material
Source: Elsevier journal article supplement (https://www.sciencedirect.com/science/article/pii/S1885585721003248)
Supplement: mmc1 [file S1885585721003248:mmc1.pdf]

## SUPPLEMENTARY DATA

### Methods of the supplementary data

#### Cardiac magnetic resonance (CMR) imaging

CMR examinations were conducted with a Philips 1.5-Tesla Achieva whole-body scanner (Philips Healthcare, Best, The Netherlands) equipped with a 32-element phased-array torso/cardiac coil. The imaging protocol included a standard segmented cine steady-state free-precession (SSFP) sequence to provide high-quality anatomical references; a  $T_1$ -weighted turbo spin echo ( $T_1$ W-TSE) sequence to assess pericardial thickness; a  $T_2$ -weighted short-tau triple inversion recovery ( $T_2$ W-STIR) sequence to assess the extent of oedema; a  $T_2$ -gradient-spin-echo mapping ( $T_2$ -GraSE map) sequence to provide precise myocardial  $T_2$  relaxation time properties; and a  $T_1$ -modified Look-Locker imaging ( $T_1$ -MOLLI with an acquisition scheme 5 [3] 3) before and 15 minutes after contrast media administration to assess myocardial  $T_1$ -relaxation time properties and extracellular volume ratio calculation. Late gadolinium enhancement (LGE) imaging was performed using several series of  $T_1$ -weighted inversion recovery imaging acquired 10 to 15 minutes after intravenous administration of 0.15 mmol gadobutrol contrast agent per kg body weight (Gadovist, Bayer HealthCare Pharmaceuticals, United States). LGE imaging includes 3-dimensional (3D) and 2D  $T_1$ -weighted inversion recovery turbo field echo ( $T_1$ -IR-TFE) with precise selection of correct inversion time with previous Look-Locker, 3D  $T_1$ -weighted phase sensitive inversion recovery ( $T_1$ -PSIR) during expiration breath-hold, and free-breathing 3D  $T_1$ -weighted phase sensitive inversion recovery (3D- $T_1$ -PSIR\_FB\_NAV) acquired with respiratory-gating to avoid breath motion artefacts. All sequences, except the last one, were acquired during expiration breath-hold mode.

The imaging parameters for each sequence were:

- SSFP cine imaging: field of view (FOV) of 320 x 320 mm, a slice thickness of 8 mm with 2 mm gap, TR 3.0 ms, TE 1.5 ms, flip angle 60°, cardiac phases 30, voxel size 2.0 x 2.0 mm<sup>2</sup>, and 1 NEX.
- T<sub>2</sub>W-STIR: FOV 320 x 320, slice thickness 10 mm, TR 2 heartbeats, TE 70 ms, voxel size 1.9 x 2.4 mm<sup>2</sup>, delay 160 ms, end-diastolic acquisition, echo-train length 35, and 2 NEX.
- T<sub>1</sub>W-TSE: FOV 320 x 320, slice thickness 8 mm with 2 mm gap, TR 1 heartbeats, TE 9 ms, voxel size 1.9 x 2.4 mm<sup>2</sup>, delay 160 ms, end-diastolic acquisition, echo-train length 24, and 1 NEX.
- T<sub>2</sub>-GraSE mapping: FOV 320 x 320 with an acquisition voxel size of 2.0 x 2.5 mm<sup>2</sup> and slice thickness 8 mm, TR 2 heartbeats, and 8 echo times ranging from 23 to 194 ms, EPI factor 7, and 1 NEX. No registration algorithm was used before estimation of T<sub>2</sub> maps; however, the presence of motion artefacts between different TE for each T<sub>2</sub> map analyzed was specifically checked.
- T<sub>1</sub>-MOLLI mapping: scheme 5 (3) 3, FOV 320 x 320 with an acquisition voxel size of 2.0 x 2.5 mm<sup>2</sup> and slice thickness 8 mm, TR 2 heartbeats, TE 1 ms, flip angle 35° and 8 to 12 echo times ranging from 200 to 4000 ms precontrast and 200 to 5000 ms postcontrast, and 1 NEX. No registration algorithm was used before estimation of T<sub>1</sub> maps; however, the presence of motion artefacts between different TE for each T<sub>1</sub> map analyzed was specifically checked.
- 3D-T<sub>1</sub>-IR-TFE: FOV 280 x 280, slice thickness 10 mm with 5 mm oversampling between slices, TR 3.0 ms, TE 1.5 ms, flip angle 14°, voxel size 2.0 x 2.3 mm<sup>2</sup>, inversion time 250 to 350 (optimized to null normal myocardium with prior Look-Locker sequence), TFE factor 50, average 1.
- 2D-T<sub>1</sub>-IR-TFE: FOV 280 x 250, slice thickness 10 mm with no gap, TR 6.0 ms, TE 3.0 ms, flip angle 25°, voxel size 1.6 x 1.9 mm<sup>2</sup>, inversion time 250 to 350 (optimized to null normal myocardium with prior Look-Locker sequence), TFE factor 24, average 1.
- 3D T<sub>1</sub>-PSIR: FOV 280 x 280, slice thickness 10 mm with 5 mm oversampling between slices, TR 5.0 ms, TE 2.0 ms, flip angle 15°, voxel size 1.9 x 2.0 mm<sup>2</sup>, TFE factor 37, average 1.
- 3D T<sub>1</sub>-PSIR with breath-gating: FOV 320 x 320, slice thickness 10 mm with 5 mm oversampling between slices, TR 5.0 ms, TE 2.0 ms, flip angle 25°, voxel size 1.9 x 1.9 mm<sup>2</sup>, TFE factor 30, average 1.

SSFP cine imaging was performed to acquire 12 contiguous short-axis slices covering the heart from the base to the apex, and on the 3 cardiac long-axis (2-chambers, 4-chambers, 3-chambers). T<sub>2</sub>W-STIR, 8 contiguous short-axis slices covering the myocardium. T<sub>1</sub>W-TSE, same slices as T<sub>2</sub>W-STIR and 8 to 10 axial slices covering the pericardium. T<sub>2</sub> and T<sub>1</sub> maps, 3 short-axis slices at base-mid papillary muscles and mid-apical level corresponding to the same anatomical level in all acquisitions. 3D-T<sub>1</sub>W-LGE 18 to 22 contiguous short-axis slices and 14 to 16 contiguous slices on 2-chamber and 4-chamber geometries covering the entire heart. 2D-T<sub>1</sub>W-LGE, 10 to 12 contiguous short-axis slices covering the heart from the base to the apex.

CMR analysis CMR images were analyzed using dedicated software (IntelliSpace Portal v.6.0.5, Philips Healthcare, The Netherlands; and MedisSuite 3.2 QMass 8.1 QMap 2.2, QStrain 2.0, Medis, The Netherlands) by 2 EACVI-CMR certified readers (M.B.-P., A.M.-G), and blinded to clinical and electrocardiogram information. CMR interpretation and measures were performed according the Society of Cardiovascular Magnetic Resonance position statement “Standardized image interpretation and postprocessing in CMR – 2020 update”.<sup>1</sup> Papillary muscles and trabecular tissue were included in the blood pool volume. Reference ranges with the same approach were used.<sup>2</sup>

Before T<sub>1</sub> and T<sub>2</sub> maps were read, the presence of motion artefacts between different TE for each map was specifically checked, and manual corrections between TE were made when necessary. To perform the segmental analysis according to the 16-segment American Heart Association model, endocardial and epicardial borders were manually traced, taking care to not include ventricle cavity or pericardium. A reference point to segment each short-axis slide was placed between anterior and anteroseptal segment.

For myocardial feature tracking analysis, cine images were analyzed with QStrain Medis v.2.0. Left ventricular global longitudinal strain (GLS) calculation was performed in 2-chamber, 3-chamber and 4-chamber long-axis views. In cardiac short-axis all software packages required drawing of an endo- and epicardial contour. Left ventricular global circumferential strain and

global radial strain calculation were performed on 3 preselected short-axis views at base-mid, mid and mid-apical levels. Long-axis direction required only an endocardial contour while drawing of an endo- and epicardial contour was required in short-axis. The contours were drawn on an end-systolic image with subsequent tracking of the contours over the remainder of the images. If tracking was suboptimal, the contours on the end-systolic and end-diastolic images were adapted before re-running the tracking analysis. Right ventricle RV-GLS was performed with similar methodology and only free-wall segments were included in the assessment. Finally, left atrium global longitudinal strain (LA-GLS) was performed similarly on 2-chamber views.

## REFERENCES

1. Schulz-Menger J, Bluemke D, Bremerich J, et al. Standardized image interpretation and post-processing in cardiovascular magnetic resonance - 2020 update : Society for Cardiovascular Magnetic Resonance (SCMR): Board of Trustees Task Force on Standardized Post-Processing. *J Cardiovasc Magn Reson*. 2020;22:19.
2. Petersen S, Khanji M, Plean S, Lancellotti P, Bucciarelli-Ducci C. European Association of Cardiovascular Imaging Expert Consensus Paper: A Comprehensive Review of Cardiovascular Magnetic Resonance Normal Values of Cardiac Chamber Size and Aortic Root in Adults and Recommendations for Grading Severity. *Eur Heart J Cardiovasc Imaging*. 2019;20:1321-1331.

**Table 1 of the supplementary data**

Cardiovascular chronic drug therapy and drug therapy aimed at ameliorating COVID-19 disease.

|                                                    | All participants | Presence of pericardial and myocardial manifestations |                         |                             |                         | P     |
|----------------------------------------------------|------------------|-------------------------------------------------------|-------------------------|-----------------------------|-------------------------|-------|
|                                                    | (N = 139)        | No<br>(n = 96)                                        | Pericarditis<br>(n = 8) | Myopericarditis<br>(n = 11) | Myocarditis<br>(n = 24) |       |
| <i>Cardiovascular chronic drug therapy</i>         |                  |                                                       |                         |                             |                         |       |
| ACE inhibitors or ARB                              | 8 (5.8)          | 6 (6.3)                                               | 0                       | 0                           | 2 (8.3)                 | .898  |
| Beta-blocker                                       | 2 (1.4)          | 1 (1.0)                                               | 0                       | 1 (9.1)                     | 0                       | .284  |
| Statin                                             | 17 (12.2)        | 16 (16.7)                                             | 0                       | 1 (9.1)                     | 0                       | .085  |
| Antiplatelet                                       | 5 (3.6)          | 5 (5.2)                                               | 0                       | 0                           | 0                       | .802  |
| Anticoagulant                                      | 4 (2.9)          | 3 (3.1)                                               | 0                       | 1 (9.1)                     | 0                       | .547  |
| <i>Treatment during SARS-CoV-2 infection</i>       |                  |                                                       |                         |                             |                         |       |
| Required hospitalization                           | 23 (16.5)        | 19 (19.8)                                             | 1 (12.5)                | 2 (18.2)                    | 1 (4.2)                 | .281  |
| Oxygen therapy                                     | 15 (10.8)        | 13 (13.5)                                             | 0                       | 1 (9.1)                     | 1 (4.2)                 | .546  |
| Paracetamol                                        | 124 (89.2)       | 86 (89.6)                                             | 6 (75.0)                | 9 (81.8)                    | 23 (95.8)               | .218  |
| Ibuprofen                                          | 17 (12.2)        | 11 (11.5)                                             | 1 (12.5)                | 4 (36.4)                    | 1 (4.2)                 | .068  |
| Azithromycin                                       | 57 (41.0)        | 39 (40.6)                                             | 4 (50.0)                | 5 (45.5)                    | 9 (37.5)                | .899  |
| Hydroxychloroquine                                 | 33 (23.7)        | 26 (27.1)                                             | 2 (25.0)                | 3 (27.3)                    | 2 (8.3)                 | .236  |
| Lopinavir-ritonavir                                | 17 (12.2)        | 14 (14.6)                                             | 1 (12.5)                | 1 (9.1)                     | 1 (4.2)                 | .56   |
| Oral glucocorticoids                               | 9 (6.5)          | 4 (4.2)                                               | 1 (12.5)                | 2 (18.2)                    | 2 (8.3)                 | .123  |
| High-dose intravenous glucocorticoids*             | 15 (10.8)        | 12 (12.5)                                             | 1 (12.5)                | 1 (9.1)                     | 1 (4.2)                 | .723  |
| Interleukin-6 inhibitors (tocilizumab, siltuximab) | 18 (12.9)        | 14 (14.6)                                             | 1 (12.5)                | 2 (18.2)                    | 1 (4.2)                 | .465  |
| Interleukin-1 inhibitor (anakinra)                 | 2 (1.4)          | 2 (2.1)                                               | 0                       | 0                           | 0                       | 1.000 |
| <i>Additional drug therapy on examination</i>      |                  |                                                       |                         |                             |                         |       |
| Inhaled glucocorticoids                            | 5 (3.6)          | 4 (4.2)                                               | 0                       | 0                           | 1 (4.2)                 | 1.000 |
| Oral glucocorticoids                               | 2 (1.4)          | 1 (1.0)                                               | 0                       | 1 (9.1)                     | 0                       | .284  |

|                              | All participants | Presence of pericardial and myocardial manifestations |                         |                             |                         | <i>P</i> |
|------------------------------|------------------|-------------------------------------------------------|-------------------------|-----------------------------|-------------------------|----------|
|                              | (N = 139)        | No<br>(n = 96)                                        | Pericarditis<br>(n = 8) | Myopericarditis<br>(n = 11) | Myocarditis<br>(n = 24) |          |
| Low-molecular weight heparin | 4 (2.9)          | 3 (3.1)                                               | 0                       | 1 (9.1)                     | 0                       | .547     |

ACE, angiotensin-converting enzyme; ARB, angiotensin receptor blocker.

The data are expressed as No. (%).

\*High-dose intravenous glucocorticoids was considered when at least a bolus of methylprednisolone of 250 mg was administered.

*P* value for comparison among the 4 participants groups.

**Table 2 of the supplementary data**

Electrocardiographic measures

|                                                       | All participants | Presence of pericardial and myocardial manifestations |                         |                             |                         | P     |
|-------------------------------------------------------|------------------|-------------------------------------------------------|-------------------------|-----------------------------|-------------------------|-------|
|                                                       | (N = 139)        | No<br>(n = 96)                                        | Pericarditis<br>(n = 8) | Myopericarditis<br>(n = 11) | Myocarditis<br>(n = 24) |       |
| <i>Sinus rhythm</i>                                   | 139 (100)        | 96 (100)                                              | 8 (100)                 | 11 (100)                    | 24 (100)                | .999  |
| Sinus tachycardia over 100 bpm                        | 2 (1.4)          | 2 (2.1)                                               | 0                       | 0                           | 0                       | .999  |
| Sinus bradycardia under 50 bpm                        | 5 (3.6)          | 3 (3.1)                                               | 0                       | 0                           | 2 (8.3)                 | .650  |
| <i>Extrasystole</i>                                   | 2 (1.4)          | 2 (2.1)                                               | 0                       | 0                           | 0                       | .999  |
| <i>Atrioventricular block or bundle branch block</i>  | 9 (6.5)          | 7 (7.3)                                               | 0                       | 0                           | 2 (8.3)                 | 1.000 |
| <i>Intraventricular conduction delay</i>              | 15 (10.8)        | 13 (13.5)                                             | 1 (12.5)                | 0                           | 1 (4.2)                 | .413  |
| <i>ST-segment depression or T-wave inversion</i>      | 23 (16.5)        | 17 (17.7)                                             | 1 (12.5)                | 1 (9.1)                     | 4 (16.7)                | .972  |
| <i>New Q waves</i>                                    | 0                | 0                                                     | 0                       | 0                           | 0                       | .999  |
| <i>Long-QT interval*</i>                              | 5 (3.6)          | 4 (4.2)                                               | 0                       | 1 (9.1)                     | 0                       | .572  |
| <i>Low voltages</i>                                   | 5 (3.6)          | 2 (2.1)                                               | 1 (12.5)                | 1 (9.1)                     | 1 (4.2)                 | .142  |
| <i>Early repolarization</i>                           | 8 (5.8)          | 7 (7.3)                                               | 0                       | 0                           | 1 (4.2)                 | .999  |
| <i>Electrocardiographic pericarditis-like changes</i> |                  |                                                       |                         |                             |                         |       |
| Widespread ST-elevation                               | 13 (9.4)         | 8 (8.3)                                               | 2 (25.0)                | 3 (27.3)                    | 0                       | .018  |
| PR depression                                         | 33 (23.7)        | 19 (19.8)                                             | 5 (62.5)                | 5 (45.5)                    | 4 (16.7)                | .014  |

The data are expressed as No. (%).

\*Long-QT interval was defined as a rate-corrected (Bazett) QT interval exceeding 450 milliseconds in males and 460 milliseconds in females.

P value for comparisons among the 4 participants groups.

**Table 3 of the supplementary data**

Electrocardiographic findings in participants with electrocardiographic abnormalities on study examination and prior baseline electrocardiogram at the time of being hired at the hospital

|                                                  | Baseline<br>electrocardiogram<br>(n = 53) | Study<br>electrocardiogram<br>(n = 53) | <i>P</i> |  |
|--------------------------------------------------|-------------------------------------------|----------------------------------------|----------|--|
| <i>Sinus rhythm</i>                              | 53 (100)                                  | 53 (100)                               | .999     |  |
| Sinus tachycardia over 100 bpm                   | 1 (1.9)                                   | 2 (3.8)                                | .999     |  |
| Sinus bradycardia under 50 bpm                   | 1 (1.9)                                   | 4 (7.5)                                | .363     |  |
| <i>Extrasystole</i>                              | 0                                         | 1 (1.9)                                | .495     |  |
| <i>AV block or bundle branch block</i>           | 1 (1.9)                                   | 3 (5.7)                                | .618     |  |
| <i>Intraventricular conduction delay</i>         | 12 (22.6)                                 | 14 (26.4)                              | .822     |  |
| <i>ST-segment depression or T-wave inversion</i> | 1 (1.9)                                   | 16 (30.2)                              | < .001   |  |
| <i>New Q waves</i>                               | 0                                         | 0                                      | .999     |  |
| <i>Long-QT interval*</i>                         | 0                                         | 2 (3.8)                                | .495     |  |
| <i>Low voltages</i>                              | 0                                         | 3 (5.7)                                | .243     |  |
| <i>Early repolarization</i>                      | 2 (3.8)                                   | 3 (5.7)                                | .999     |  |
| <i>Pericarditis-like changes</i>                 |                                           |                                        |          |  |
| Widespread ST elevation                          | 0                                         | 13 (24.5)                              | < .001   |  |
| PR depression                                    | 0                                         | 28 (52.8)                              | < .001   |  |

Data are expressed as No. (%).

\*Long-QT interval was defined as a rate-corrected (Bazett) QT interval exceeding 450 milliseconds in men and 460 milliseconds in women.

*P* value for comparison among the 4 participants groups.



**Table 4 of the supplementary data**

Left ventricular myocardial T<sub>1</sub>-relaxation time, T<sub>1</sub>-extracellular volume, and T<sub>2</sub>-relaxation time reference ranges extracted from the population-based controls

| Controls | Native T <sub>1</sub> -relaxation time (msec) |      |                 |       | T <sub>1</sub> -extracellular volume (%) |     |                 |      | T <sub>2</sub> -relaxation time (msec) |     |                 |      |
|----------|-----------------------------------------------|------|-----------------|-------|------------------------------------------|-----|-----------------|------|----------------------------------------|-----|-----------------|------|
| Segment  | Mean                                          | SD   | 95%CI (sup-inf) |       | Mean                                     | SD  | 95%CI (sup-inf) |      | Mean                                   | SD  | 95%CI (sup-inf) |      |
| 1        | 1017.4                                        | 31.7 | 1079.5          | 955.3 | 25.6                                     | 3.3 | 32.0            | 19.1 | 51.5                                   | 5.6 | 62.5            | 40.6 |
| 2        | 1007.9                                        | 39.9 | 1086.1          | 929.6 | 26.0                                     | 2.9 | 31.7            | 20.3 | 49.7                                   | 7.6 | 64.5            | 34.8 |
| 3        | 1013.0                                        | 35.1 | 1081.8          | 944.3 | 26.5                                     | 2.5 | 31.4            | 21.6 | 48.8                                   | 4.7 | 58.0            | 39.6 |
| 4        | 1023.1                                        | 37.0 | 1095.7          | 950.6 | 26.9                                     | 3.1 | 32.9            | 20.8 | 49.3                                   | 5.4 | 59.9            | 38.8 |
| 5        | 1042.0                                        | 32.0 | 1104.8          | 979.2 | 25.6                                     | 2.7 | 30.9            | 20.2 | 50.5                                   | 7.1 | 64.4            | 36.5 |
| 6        | 1023.2                                        | 34.7 | 1091.3          | 955.2 | 24.9                                     | 2.8 | 30.4            | 19.3 | 46.6                                   | 8.6 | 63.4            | 29.8 |
| 7        | 1003.7                                        | 38.0 | 1078.2          | 929.2 | 26.3                                     | 3.6 | 33.4            | 19.2 | 47.2                                   | 8.0 | 62.8            | 31.5 |
| 8        | 1009.7                                        | 44.5 | 1096.9          | 922.6 | 26.8                                     | 3.1 | 32.9            | 20.7 | 52.4                                   | 7.4 | 66.8            | 38.0 |
| 9        | 1017.9                                        | 41.4 | 1099.1          | 936.8 | 26.8                                     | 3.2 | 33.1            | 20.4 | 51.6                                   | 5.7 | 62.7            | 40.5 |
| 19       | 1026.7                                        | 41.3 | 1107.7          | 945.7 | 26.0                                     | 3.4 | 32.7            | 19.3 | 51.3                                   | 6.5 | 64.0            | 38.6 |
| 11       | 1024.8                                        | 38.9 | 1101.0          | 948.6 | 25.2                                     | 2.8 | 30.6            | 19.8 | 53.0                                   | 5.9 | 64.5            | 41.6 |
| 12       | 1023.0                                        | 41.4 | 1104.1          | 941.8 | 25.3                                     | 2.7 | 30.6            | 20.0 | 49.9                                   | 8.1 | 65.8            | 34.0 |
| 13       | 1011.1                                        | 41.6 | 1092.7          | 929.6 | 26.9                                     | 2.9 | 32.6            | 21.2 | 50.0                                   | 7.2 | 64.1            | 35.8 |
| 14       | 1025.8                                        | 45.7 | 1115.5          | 936.2 | 27.3                                     | 3.5 | 34.0            | 20.5 | 52.1                                   | 7.5 | 66.8            | 37.5 |
| 15       | 1021.4                                        | 56.5 | 1132.2          | 910.6 | 25.7                                     | 3.9 | 33.4            | 17.9 | 53.0                                   | 6.3 | 65.3            | 40.8 |
| 16       | 1017.6                                        | 57.3 | 1129.9          | 905.2 | 25.7                                     | 3.5 | 32.6            | 18.8 | 51.9                                   | 5.4 | 62.5            | 41.4 |

95%CI, 95% confidence interval; SD, standard deviation; sup, superior; inf, inferior.

Table 5 of the supplementary data

Interpretable segments of all possible for T<sub>1</sub>-relaxation time, T<sub>1</sub>-extracellular volume, and T<sub>2</sub>-relaxation time

|                                      | Interpretable segments | All segments | Percentage of analyzed segments |
|--------------------------------------|------------------------|--------------|---------------------------------|
| T <sub>1</sub> -relaxation time      | 1963                   | 2224         | 88.3                            |
| T <sub>1</sub> -extracellular volume | 1933                   | 2224         | 86.9                            |
| T <sub>2</sub> -relaxation time      | 2076                   | 2224         | 93.3                            |

Of all 2224 segments (16 segments per patient x 139 patients), increased T<sub>2</sub>-relaxation time was noted in 12 segments out of 2076 (0.6%), T<sub>2</sub>-weighted hyperintensity in 45 segments out of 2224 (2.0%), increased T<sub>1</sub>-relaxation time in 102 segments out of 1963 (5.2%), T<sub>1</sub>-extracellular volume in 213 segments out of 1933 (11.0%), and T<sub>1</sub>-LGE in 21 segments out of 2224 (0.9%). Edema and fibrotic areas had a subepicardial only distribution, or a subepicardial to mid-wall distribution, with sparing of endocardium and subendocardium in all patients. Overall T<sub>1</sub> and extracellular volume segments read were 88.3% and 86.9% respectively (T<sub>1</sub> native basal short-axis slice 97.1%, mid 96.7%, and apical 62.2%). Overall T<sub>2</sub> segments read 93.3% (basal short-axis slice 91.5%, mid 95.6%, and apical 92.8%). The highest percentage of segments rejected were at the apical level. Only 2 of 35 patients with myocarditis/myopericarditis were diagnosed based on apical segment values.

**Table 6 of the supplementary data**

Baseline characteristic and on examination for participants testing positive for SARS-CoV-2 by RT-PCR or by anti-SARS-CoV-2-IgG antibodies.

|                                              | RT-PCR<br>(n = 103) | Anti-SARS-CoV-2-IgG<br>(n = 36) | P    |
|----------------------------------------------|---------------------|---------------------------------|------|
| <b>Age, y</b>                                | 52 [43–58]          | 50 [39–56]                      | .245 |
| <b>Female sex</b>                            | 70 (68.0)           | 30 (83.3)                       | .088 |
| <b>Health care worker category</b>           |                     |                                 | .001 |
| <i>Medical staff</i>                         | 31 (30.1)           | 4 (11.1)                        |      |
| <i>Nurse</i>                                 | 41 (39.8)           | 8 (22.2)                        |      |
| <i>Other</i>                                 | 31 (30.1)           | 24 (67.7)                       |      |
| <b>Direct attention to COVID-19 patients</b> | 44 (42.7)           | 23 (63.9)                       | .034 |
| <b>Coexisting conditions</b>                 |                     |                                 |      |
| <i>Obesity<sup>a</sup></i>                   | 11 (10.7)           | 6 (16.7)                        | .559 |
| <i>Hypertension</i>                          | 14 (13.6)           | 3 (8.3)                         | .559 |
| <i>Diabetes</i>                              | 1 (1.0)             | 1 (2.8)                         | .452 |
| <i>Dyslipidaemia</i>                         | 22 (21.4)           | 5 (13.9)                        | .464 |
| <i>Current smoking</i>                       | 5 (4.9)             | 1 (2.8)                         | .999 |
| <i>Past smoking</i>                          | 50 (48.5)           | 20 (55.6)                       | .562 |
| <i>Alcohol use<sup>b</sup></i>               | 19 (18.4)           | 4 (11.1)                        | .436 |
| <i>Cardiovascular disease</i>                | 6 (5.8)             | 2 (5.6)                         | .999 |
| <i>Pulmonary disease<sup>c</sup></i>         | 6 (5.8)             | 2 (5.6)                         | .999 |
| <i>Sleep apnoea-hypopnea syndrome</i>        | 8 (7.8)             | 0                               | .112 |
| <i>Chronic kidney disease</i>                | 3 (2.9)             | 2 (5.6)                         | .604 |
| <i>Cancer</i>                                | 3 (2.9)             | 1 (2.8)                         | .999 |
| <i>At least 1 of the above</i>               | 78 (75.7)           | 28 (77.8)                       | .999 |
| <b>Symptoms at SARS-CoV-2 infection</b>      |                     |                                 |      |

|                                            | RT-PCR<br>(n = 103) | Anti-SARS-CoV-2-IgG<br>(n = 36) | P      |
|--------------------------------------------|---------------------|---------------------------------|--------|
| <i>Number of symptoms</i>                  | 8 [5-10]            | 5 [3-7]                         | .001   |
| <i>General</i>                             |                     |                                 |        |
| Fatigue                                    | 87 (84.5)           | 30 (83.3)                       | .999   |
| Fever                                      | 81 (78.6)           | 13 (36.1)                       | < .001 |
| Cough                                      | 70 (68.0)           | 21 (58.3)                       | .314   |
| Headache                                   | 68 (66.0)           | 22 (61.1)                       | .686   |
| Myalgia                                    | 67 (65.0)           | 16 (44.4)                       | .047   |
| Anosmia                                    | 61 (59.2)           | 12 (33.3)                       | .011   |
| Ageusia                                    | 52 (50.5)           | 14 (38.9)                       | .251   |
| Abdominal pain or diarrhoea                | 54 (52.4)           | 10 (27.8)                       | .012   |
| Chills                                     | 52 (50.5)           | 8 (22.2)                        | .003   |
| Sore throat                                | 42 (40.8)           | 13 (36.1)                       | .695   |
| Nausea or vomiting                         | 24 (23.3)           | 6 (16.7)                        | .361   |
| Clumsiness                                 | 17 (16.5)           | 3 (8.3)                         | .281   |
| Memory loss                                | 15 (14.6)           | 4 (11.1)                        | .780   |
| Skin lesions                               | 4 (3.9)             | 1 (2.8)                         | .999   |
| <i>Cardiac</i>                             |                     |                                 |        |
| Shortness of breath                        | 53 (51.5)           | 15 (41.7)                       | .339   |
| Palpitations                               | 33 (32.0)           | 11 (30.6)                       | .999   |
| Chest pain                                 | 31 (30.1)           | 9 (25.0)                        | .671   |
| Dizziness                                  | 3 (2.9)             | 1 (2.8)                         | .999   |
| At least 1 cardiac symptom                 | 66 (64.1)           | 20 (55.6)                       | .427   |
| <b>Covid-19 confirmed pneumonia</b>        | 26 (25.2)           | 1 (2.8)                         | .003   |
| <b>Cardiovascular chronic drug therapy</b> |                     |                                 |        |
| <i>ACE inhibitors or ARB</i>               | 6 (5.8)             | 2 (5.6)                         | .999   |

|                                                           | RT-PCR<br>(n = 103) | Anti-SARS-CoV-2-IgG<br>(n = 36) | P      |
|-----------------------------------------------------------|---------------------|---------------------------------|--------|
| <i>Beta-blocker</i>                                       | 2 (1.9)             | 0                               | .999   |
| <i>Statin</i>                                             | 13 (12.6)           | 4 (11.1)                        | .999   |
| <i>Antiplatelet</i>                                       | 5 (4.9)             | 0                               | .327   |
| <i>Anticoagulant</i>                                      | 4 (3.9)             | 0                               | .572   |
| <b>Treatment at SARS-CoV-2 infection</b>                  |                     |                                 |        |
| <i>Required hospitalization</i>                           | 22 (21.4)           | 1 (2.8)                         | .008   |
| <i>Oxygen therapy</i>                                     | 14 (13.6)           | 1 (2.8)                         | .115   |
| <i>Paracetamol</i>                                        | 95 (92.2)           | 29 (80.6)                       | .065   |
| <i>Ibuprofen</i>                                          | 12 (11.7)           | 5 (13.9)                        | .770   |
| <i>Azithromycin</i>                                       | 54 (52.4)           | 3 (8.3)                         | < .001 |
| <i>Hydroxychloroquine</i>                                 | 32 (31.1)           | 1 (2.8)                         | < .001 |
| <i>Lopinavir-ritonavir</i>                                | 16 (15.5)           | 1 (2.8)                         | .072   |
| <i>Oral glucocorticoids</i>                               | 9 (8.7)             | 0                               | .111   |
| <i>High-doses intravenous glucocorticoids<sup>d</sup></i> | 14 (13.6)           | 1 (2.8)                         | .115   |
| <i>Interleukin-6 inhibitors (tocilizumab, siltuximab)</i> | 17 (16.5)           | 1 (2.8)                         | .042   |
| <i>Interleukin-1 inhibitor (anakinra)</i>                 | 2 (1.9)             | 0                               | .999   |
| <b>Additional drug therapy at examination</b>             |                     |                                 |        |
| <i>Inhaled glucocorticoids</i>                            | 5 (4.9)             | 0                               | .327   |
| <i>Oral glucocorticoids</i>                               | 2 (1.9)             | 0                               | .999   |
| <i>Low-molecular weight heparin</i>                       | 4 (3.9)             | 0                               | .572   |
| <b>Vital signs on examination</b>                         |                     |                                 |        |
| <i>Blood pressure, mmHg</i>                               |                     |                                 |        |
| Systolic                                                  | 125 [113-140]       | 122 [113-137]                   | .883   |
| Diastolic                                                 | 76 [70-82]          | 75 [69-84]                      | .899   |

|                                     | RT-PCR<br>(n = 103) | Anti-SARS-CoV-2-IgG<br>(n = 36) | P    |
|-------------------------------------|---------------------|---------------------------------|------|
| <i>Heart rate, bpm</i>              | 71 [63-80]          | 69 [63-79]                      | .686 |
| <i>Oxygen saturation &lt; 95%</i>   | 7 (6.8)             | 3 (8.3)                         | .719 |
| <b>Physical examination</b>         |                     |                                 |      |
| <i>Pericardial rub</i>              | 0                   | 0                               | .999 |
| <i>Heart murmur</i>                 | 2 (1.9)             | 1 (2.8)                         | .999 |
| <i>Third and fourth heart sound</i> | 0                   | 0                               | .999 |
| <i>Pulmonary crackles</i>           | 4 (3.9)             | 1 (2.8)                         | .999 |
| <b>Symptoms on examination</b>      |                     |                                 |      |
| <i>No symptoms</i>                  | 30 (29.1)           | 18 (50.0)                       | .027 |
| <i>General</i>                      |                     |                                 |      |
| Fatigue                             | 33 (32.0)           | 4 (11.1)                        | .016 |
| Anosmia                             | 9 (8.7)             | 3 (8.3)                         | .999 |
| Ageusia                             | 5 (4.9)             | 2 (5.6)                         | .999 |
| Headache                            | 6 (5.8)             | 1 (2.8)                         | .677 |
| Sore throat                         | 6 (5.8)             | 1 (2.8)                         | .677 |
| Abdominal pain                      | 4 (3.9)             | 2 (5.6)                         | .649 |
| Memory loss                         | 4 (3.9)             | 0                               | .572 |
| Joint pain                          | 3 (2.9)             | 0                               | .568 |
| Piloerection                        | 2 (1.9)             | 0                               | .999 |
| <i>Cardiac</i>                      |                     |                                 |      |
| Dyspnoea or shortness of breath     | 28 (27.2)           | 8 (22.2)                        | .661 |
| Chest pain                          | 21 (20.4)           | 6 (16.7)                        | .807 |
| Pericarditis-like                   | 16 (15.5)           | 2 (5.6)                         | .157 |
| Palpitations                        | 17 (16.5)           | 3 (8.3)                         | .281 |
| Dizziness                           | 5 (4.9)             | 3 (8.3)                         | .427 |

|                            | RT-PCR<br>(n = 103) | Anti-SARS-CoV-2-IgG<br>(n = 36) | <i>P</i> |
|----------------------------|---------------------|---------------------------------|----------|
| At least 1 cardiac symptom | 44 (42.7)           | 14 (38.9)                       | .845     |

ACE, angiotensin-converting enzyme; ARB, angiotensin receptor blocker.

The data are expressed as No. (%) and median [interquartile range].

<sup>a</sup> Obesity was considered if body-mass index of 30 or more.

<sup>b</sup> Alcohol use was considered an average of at least 1 drink a day.

<sup>c</sup> All participants with previous pulmonary disease reported asthma.

<sup>d</sup> High-doses intravenous glucocorticoids was considered when at least a bolus of methylprednisolone of 250 mg was administered. *P* value for comparison among both groups.

Table 7 of the supplementary data

Distribution of subsets of myeloid immune cells in blood.

|                                                   | Healthy donors<br>(n = 463) | All participants<br>(N = 139) | P             | Presence of pericardial and myocardial manifestations |                         |                             |                         | P           |
|---------------------------------------------------|-----------------------------|-------------------------------|---------------|-------------------------------------------------------|-------------------------|-----------------------------|-------------------------|-------------|
|                                                   |                             |                               |               | No<br>(n = 96)                                        | Pericarditis<br>(n = 8) | Myopericarditis<br>(n = 11) | Myocarditis<br>(n = 24) |             |
| <b>Neutrophils</b>                                | 3723 [2969-4613]            | 3430 [2633-4225]              | 0.010         | 3468 [2647-4223]                                      | 3013 [2385-3699]        | 3966 [3157-4255]            | 3023 [1966-4208]        | .491        |
| % cases ↓ 5 <sup>th</sup> p/ ↑ 95 <sup>th</sup> p | -                           | 18 (12.9)/5 (3.6)             | < .001/.001   | 10 (10.4)/4 (4.2)                                     | 1 (12.5)/0              | 0/0                         | 7 (29.2)/1 (4.2)        | .051 / .844 |
| MDSC-like neutrophils                             | 6 [2-13]                    | 2 [1-5]                       | .550          | 2.9 [1.3-7.6]                                         | 2 [0.4-5]               | 2 [1-3]                     | 2 [1-4]                 | .625        |
| Immature CD16 <sup>+</sup> CD62L <sup>-</sup>     | 5 [2-9]                     | 2 [0.8-4]                     | .563          | 2 [0.9-6]                                             | 1 [0.4-4]               | 2 [0.6-2]                   | 2 [0.9-3]               | .604        |
| Immature CD16 <sup>+</sup> CD62L <sup>+</sup>     | 0.6 [0.2-1]                 | 0.5 [0.2-1]                   | .677          | 0.7 [0.3-1]                                           | 0.5 [0.1-1]             | 0.4 [0.2-0.7]               | 0.4 [0.2-0.7]           | .840        |
| <b>Eosinophils</b>                                | 157 [101-249]               | 74 [47-149]                   | < .001        | 82 [50-130]                                           | 48 [31-189]             | 59 [46-69]                  | 102 [39-191]            | .463        |
| % cases ↓ 5 <sup>th</sup> p/ ↑ 95 <sup>th</sup> p | -                           | 38 (27.3)/1 (0.7)             | < .001/.231   | 24 (25.0)/1 (1.0)                                     | 4 (50.0)/0              | 3 (27.3)/0                  | 7 (29.2)/0              | .499 / .929 |
| <b>Basophils</b>                                  | 38 [21-52]                  | 47 [35-62]                    | .007          | 49 [37-62]                                            | 34 [23-55]              | 36 [29-56]                  | 51 [38-65]              | .293        |
| % cases ↓ 5 <sup>th</sup> p/ ↑ 95 <sup>th</sup> p | -                           | 4 (2.9)/5 (3.6)               | < .001/< .001 | 2 (2.1)/3 (3.2)                                       | 1 (12.5)/1 (25)         | 1 (9.1)/1 (9.1)             | 0/1 (4.2)               | .169 / .719 |
| <b>Monocytes</b>                                  | 317 [245-433]               | 405 [328-523]                 | < .001        | 418 [345-533]                                         | 369 [307-424]           | 404 [347-476]               | 358 [282-574]           | .724        |
| % cases ↓ 5 <sup>th</sup> p/ ↑ 95 <sup>th</sup> p | -                           | 3 (2.2)/8 (5.8)               | .012/ < .001  | 3 (3.1)/5 (5.2)                                       | 0/ 1 (12.5)             | 0/0                         | 0/2 (8.3)               | .712 / .639 |
| Classical monocytes                               | 271 [210-355]               | 342 [267-437]                 | .005          | 357 [289-447]                                         | 298 [319-669]           | 386 [264-413]               | 297 [210-437]           | .592        |
| CD62L <sup>+</sup> FcεRI <sup>+</sup>             | 31 [5-48]                   | 14 [3-59]                     | .911          | 18 [5-61]                                             | 4 [1-95]                | 1 [0.5-35]                  | 11 [5-46]               | .914        |
| CD62L <sup>+</sup> FcεRI <sup>-</sup>             | 140 [90-183]                | 234 [161-345]                 | < .001        | 242 [160-369]                                         | 291 [248-513]           | 249 [50-350]                | 182 [157-244]           | .304        |
| CD62L <sup>-</sup> FcεRI <sup>+</sup>             | 5 [1-22]                    | 2 [0.3-7]                     | .935          | 2 [0.3-7]                                             | 0.4 [0.1-3]             | 2 [0.1-10]                  | 4 [0.4-10]              | .424        |
| CD62L <sup>-</sup> FcεRI <sup>-</sup>             | 69 [36-176]                 | 42 [23-77]                    | < .001        | 41 [20-79]                                            | 34 [22-42]              | 69 [37-117]                 | 49 [32-75]              | .704        |
| Intermediate monocytes                            | 14 [10-20]                  | 15 [10-19]                    | .865          | 15 [10-21]                                            | 13 [4-17]               | 13 [8-18]                   | 16 [10-19]              | .745        |
| Nonclassic monocytes                              | 33 [25-42]                  | 43 [32-63]                    | .003          | 43 [32-67]                                            | 39 [35-52]              | 42 [33-69]                  | 43 [29-60]              | .897        |
| <b>Dendritic cells</b>                            | 29 [20-35]                  | 28 [20-35]                    | .561          | 28 [20-35]                                            | 28 [20-33]              | 29 [18-42]                  | 23 [19-35]              | .920        |
| % cases ↓ 5 <sup>th</sup> p/ ↑ 95 <sup>th</sup> p | -                           | 14 (10.2)/5 (3.6)             | < .001/< .001 | 11 (11.7)/5 (5.3)                                     | 0/0                     | 1 (9.1)/0                   | 2 (8.3)/0               | .755 / .508 |
| MDSC                                              | 0 [0-1.1]                   | 0.8 [0.3-1.4]                 | .311          | 0.8 [0.3-1.7]                                         | 0.5 [0.4-0.8]           | 0.8 [0.5-1.4]               | 0.8 [0.3-1.3]           | .212        |



*Pericarditis and myocarditis after SARS-CoV-2 infection*  
*Supplementary Material*  
*Eiros et al. 17*

|                                        | Healthy donors<br>(n = 463) | All participants<br>(N = 139) | <i>P</i> | Presence of pericardial and myocardial manifestations |                         |                             |                         | <i>P</i> |
|----------------------------------------|-----------------------------|-------------------------------|----------|-------------------------------------------------------|-------------------------|-----------------------------|-------------------------|----------|
|                                        |                             |                               |          | No<br>(n = 96)                                        | Pericarditis<br>(n = 8) | Myopericarditis<br>(n = 11) | Myocarditis<br>(n = 24) |          |
| <i>Myeloid dendritic cells</i>         | 18 [14-26]                  | 19 [14-26]                    | .180     | 19 [14-25]                                            | 20 [16-26]              | 22 [13-29]                  | 16 [13-28]              | .953     |
| CD1c <sup>+</sup> m dendritic cells    | 17 [14-25]                  | 19 [14-25]                    | .210     | 19 [13-25]                                            | 19 [15-26]              | 20 [13-27]                  | 15 [13-24]              | .755     |
| CD141 <sup>+</sup> m dendritic cells   | 1 [0.6-1]                   | 0.9 [0.6-1]                   | .284     | 0.9 [0.6-1]                                           | 0.6 [0.5-1]             | 0.8 [0.7-2]                 | 0.6 [0.5-1]             | .227     |
| <i>Plasmacytoid dendritic cells</i>    | 8 [6-11]                    | 6 [4-9]                       | .205     | 6 [5-10]                                              | 6 [1-11]                | 7 [5-8]                     | 6 [4-8]                 | .816     |
| <i>Axl<sup>+</sup> dendritic cells</i> | 0.3 [0.2-0.4]               | 0.3 [0.2-0.5]                 | .271     | 0.3 [0.2-0.5]                                         | 0.2 [0.1-0.4]           | 0.3 [0.2-0.5]               | 0.3 [0.2-0.5]           | .408     |

MDSC, myeloid-derived suppressor cells, m, myeloid.

The data are expressed as median [interquartile range] of cells/ $\mu$ L of blood or No. (%) of cases lower than the 5th percentile ( $\downarrow$ 5<sup>th</sup>p) and higher than 95th percentile ( $\uparrow$ 95<sup>th</sup>p) for each cell subset in age-matched healthy donors. Left *P* value for comparisons between healthy donors vs all participants. Right *P* value for comparison among the 4 participant groups. Comparisons between healthy donors vs all participants are adjusted for age and sex.

**Table 8 of the supplementary data**

Distribution of the major subsets of lymphoid cells in blood

|                                                             | Healthy donors<br>(n = 463) | All participants<br>(N = 139) | P             | Presence of pericardial and myocardial manifestations |                         |                             |                         | P           |
|-------------------------------------------------------------|-----------------------------|-------------------------------|---------------|-------------------------------------------------------|-------------------------|-----------------------------|-------------------------|-------------|
|                                                             |                             |                               |               | No<br>(n = 96)                                        | Pericarditis<br>(n = 8) | Myopericarditis<br>(n = 11) | Myocarditis<br>(n = 24) |             |
| <b>Lymphocytes</b>                                          | 1675 [1332-2223]            | 2221 [1717-2563]              | < .001        | 2294 [1854-2760]                                      | 1990 [1555-2422]        | 1660 [1379-2089]            | 1998 [1619-2439]        | .055        |
| % cases ↓ 5 <sup>th</sup> p/ ↑ 95 <sup>th</sup> p           | -                           | 3 (2)/8 (6)                   | .012/< .001   | 1 (1.0)/6 (6.3)                                       | 1 (12.5)/1 (12.5)       | 1 (9.1)/0                   | 0/1 (4.2)               | .054 / .683 |
| <b>T cells</b>                                              | 1246 [943-1642]             | 1652 [1348-1985]              | < .001        | 1747 [1417-2003]                                      | 1417 [1194-1938]        | 1350 [1186-1621]            | 1635 [1309-2018]        | .102        |
| % cases ↓ 5 <sup>th</sup> p/ ↑ 95 <sup>th</sup> p           | -                           | 1 (1)/10 (7)                  | .231/< .001   | 0/8 (8.3)                                             | 0/1 (12.5)              | 1 (9.1)/0                   | 0/1 (4.2)               | .304 / .636 |
| CD4+ T cells                                                | 716 [567-961]               | 1017 [791-1263]               | < .001        | 1041 [817-1273]                                       | 867 [836-1011]          | 841 [719-902]               | 1071 [711-1332]         | .066        |
| % cases ↓ 5 <sup>th</sup> p/ ↑ 95 <sup>th</sup> p           | -                           | 1 (1)/14 (10)                 | .231/< .001   | 0/11 (11.5)                                           | 0/1 (12.5)              | 1 (9.1)/0                   | 0/2 (8.3)               | .304 / .667 |
| CD8+ T cells                                                | 407 [291-590]               | 507 [388-696]                 | < .001        | 541 [392-751]                                         | 383 [338-788]           | 452 [335-556]               | 529 [413-647]           | .592        |
| % cases ↓ 5 <sup>th</sup> p/ ↑ 95 <sup>th</sup> p           | -                           | 0/9 (6.5)                     | -/< .001      | 0/7 (7.3)                                             | 0/1 (12.5)              | 0/0                         | 0/1 (4.2)               | - / .669    |
| CD4 <sup>+</sup> CD8 <sup>-lo</sup> T cells                 | 46 [28-79]                  | 78 [48-130]                   | < .001        | 88 [48-133]                                           | 104 [64-157]            | 71 [64-77]                  | 67 [37-111]             | .456        |
| % cases ↓ 5 <sup>th</sup> p/ ↑ 95 <sup>th</sup> p           | -                           | 5 (3.6)/24 (17.3)             | .003/< .001   | 4 (4.2)/17 (17.7)                                     | 1 (12.5)/2 (25.0)       | 0/1 (9.1)                   | 0/4 (16.7)              | .385 / .833 |
| CD4 <sup>+</sup> CD8 <sup>-lo</sup> T <sub>H</sub> 17 cells | 26 [15-36]                  | 21 [14-33]                    | .892          | 22 [14-37]                                            | 29 [14-41]              | 21 [15-25]                  | 17 [11-28]              | .448        |
| % cases ↓ 5 <sup>th</sup> p/ ↑ 95 <sup>th</sup> p           | -                           | 7 (5.0)/10 (7.2)              | < .001/< .001 | 5 (5.2)/8 (8.3)                                       | 2 (25.0)/0              | 0/0                         | 0/2 (8.3)               | .036 / .636 |
| T <sub>H</sub> 17 cells                                     | 56 [33-107]                 | 52 [31-93]                    | .609          | 59 [32-93]                                            | 76 [40-128]             | 49 [38-58]                  | 46 [22-73]              | .610        |
| % cases ↓ 5 <sup>th</sup> p/ ↑ 95 <sup>th</sup> p           | -                           | 2 (1.4)/8 (5.8)               | .053/< .001   | 2 (2.1)/7 (7.3)                                       | 0/1 (12.5)              | 0/0                         | 0/0                     | .823 / .499 |
| <b>NK cells</b>                                             | 260 [162-372]               | 213 [137-321]                 | .427          | 237 [143-337]                                         | 233 [142-281]           | 120 [76-321]                | 156 [137-248]           | .230        |
| % cases ↓ 5 <sup>th</sup> p/ ↑ 95 <sup>th</sup> p           | -                           | 9 (6.5)/6 (4.3)               | < .001/0.001  | 5 (5.2)/5 (5.2)                                       | 0/0                     | 3 (27.3)/0                  | 1 (4.2)/1 (4.2)         | .003 / .791 |
| <b>B cells</b>                                              | 154 [108-228]               | 208 [158-297]                 | < .001        | 234 [175-327]                                         | 233 [119-443]           | 174 [153-188]               | 181 [136-230]           | .020        |
| % cases ↓ 5 <sup>th</sup> p/ ↑ 95 <sup>th</sup> p           | -                           | 2 (1.4)/16 (11.5)             | .053/< .001   | 1 (1.0)/10 (12.5)                                     | 1 (12.5)/2 (25.0)       | 0/0                         | 0/2 (8.3)               | .525 / .362 |
| <b>Plasma cells</b>                                         | 2 [0.8-3]                   | 0.8 [0.3-2]                   | < .001        | 0.9 [0.5-2]                                           | 1 [0.2-1]               | 0.4 [0.3-0.8]               | 1 [0.3-2]               | .362        |

*Pericarditis and myocarditis after SARS-CoV-2 infection*  
*Supplementary Material*  
*Eiros et al. 19*

|                                                | Healthy donors<br>(n = 463) | All participants<br>(N = 139) | <i>P</i>    | Presence of pericardial and myocardial manifestations |                         |                             |                         | <i>P</i>    |
|------------------------------------------------|-----------------------------|-------------------------------|-------------|-------------------------------------------------------|-------------------------|-----------------------------|-------------------------|-------------|
|                                                |                             |                               |             | No<br>(n = 96)                                        | Pericarditis<br>(n = 8) | Myopericarditis<br>(n = 11) | Myocarditis<br>(n = 24) |             |
| % cases ↓5 <sup>th</sup> p/↑95 <sup>th</sup> p | -                           | 11 (7.9)/1 (0.7)              | < .001/.231 | 7 (7.3)/1 (1.0)                                       | 0/0                     | 2 (18.2)/0                  | 2 (8.3)/0               | .506 / .929 |

NK, natural killer.

The data are expressed as the median [interquartile range] of cells/μL of blood or No. (%) of cases lower than the 5th percentile (↓5<sup>th</sup>p) and higher than the 95th percentile (↑95<sup>th</sup>p) for each cell subset in age-matched healthy donors. Left *P* value for comparisons between healthy donors vs all participants. Right *P* value for comparison among the 4 participant groups. Comparisons between healthy donors vs all participants are adjusted for age and sex.

**Figure 1 of the supplementary data.** An example of electrocardiographic pericarditis-like changes. Widespread ST elevation and PR depression is observed.

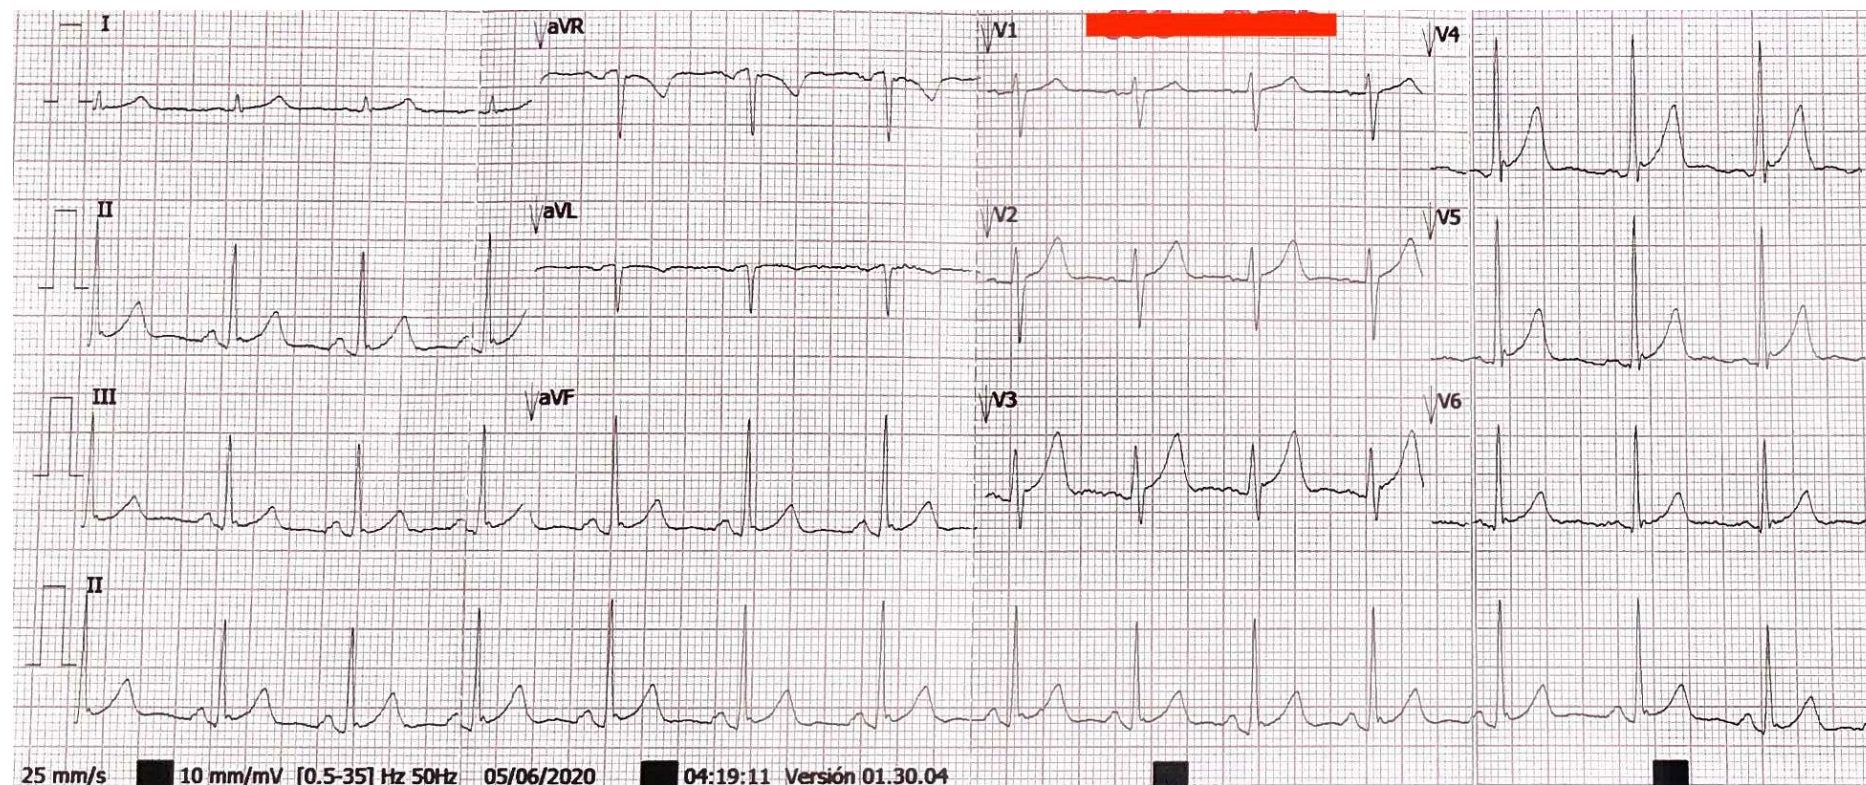

*Eiros R. Pericardial and myocardial involvement after SARS-CoV-2 infection: a cross-sectional descriptive study in health care workers*

## **LISTADO DE INVESTIGADORES**

The following investigators participated in the CCC (Cardiac Covid-19 health care workers) study:

Cardiology Department, University Hospital of Salamanca, IBSAL, Salamanca, Spain: Pedro L Sánchez, Rocío Eiros, Manuel Barreiro-Pérez, Ana Martín-García, Eduardo Villacorta, Soraya Merchán, Clara Sánchez-Pablo, David González-Calle, Inés Toranzo, Elena Díaz-Peláez, Laura Macías-Álvarez, Nuria Sánchez-Barbero, Ana Moralejo-Salinas, Leticia Vicente-Pacho, Pedro Vara-González, Juan Carlos Castro-Garay, Pablo Luengo Modéjar, P. Ignacio Dorado-Díaz, and Alberto García-Galindo.

Occupational Health Service, University Hospital of Salamanca, IBSAL, Salamanca, Spain: José L Bravo-Grande, M Asunción Blanco-González, Elena Alonso-Vicente, Patricia Arranz-Vaquero.

Translational and Clinical Research Program, Centro de Investigación del Cáncer (CIC) Instituto de Biología Molecular y Celular del Cancer (IBMCC), IBSAL, Salamanca, Spain: Alberto Orfao, Julia Almeida, Alba Pérez-Pons, Alba Torres-Valle, Oihane Pérez-Escorza, Blanca Fuentes-Herrero, Guillermo Oliva-Ariza, Quentin Lecrevisse, Rafael Fluxa, Martín Pérez-Andrés, Vitor Botafogo Gonçalves, Daniela Damasceno, and Francisco Javier Morán-Plata.

## **CONFLICTS OF INTEREST**

M. Pérez-Andrés, V. Botafogo y D. Damasceno report being one of the inventors on the EuroFlow-owned European patent 119646NL00 registered in November 2019 (Means and methods for multiparameter flow cytometry based leukocyte subsetting).

**Pedro L Sánchez as corresponding author confirms that the entire list of investigators is in agreement with the content of the manuscript and its submission to *Revista Española de Cardiología*.**
